# Supplementary material for: Improved efficiency in fullerene and non-fullerene polymer solar cells having an interdigitated interface with the electron transport layer
Source: Royal Society of Chemistry journal article supplement (doi:10.1039/c8qm00347e), 2018-01-01
Supplement: c8qm00347e1.pdf [file c8qm00347e1.pdf]

## Supplementary Information

### Improved Efficiency in Fullerene and Non-fullerene Polymer Solar Cells having an Interdigitated Interface with the Electron Transport Layer

*Yu Yan<sup>a,b</sup>, Wei Li<sup>a,b</sup>, Jinlong Cai<sup>a,b</sup>, Mengxue Chen<sup>a,b</sup>, Yuchao Mao<sup>a,b</sup>, Xiaolong Chen<sup>a,b</sup>, Robert  
S. Gurney<sup>a,b</sup>, Dan Liu<sup>a,b</sup>, Fei Huang<sup>c</sup>, Tao Wang<sup>a,b\*</sup>*

<sup>a</sup>School of Materials Science and Engineering, Wuhan University of Technology, Wuhan, 430070,  
China

<sup>b</sup>State Key Laboratory of Silicate Materials for Architectures, Wuhan University of Technology,  
Wuhan, 430070, China

<sup>c</sup>Institute of Polymer Optoelectronic Materials and Devices, State Key Laboratory of Luminescent  
Materials and Devices, South China University of Technology, Guangzhou, 510641, China

\*The corresponding author: [twang@whut.edu.cn](mailto:twang@whut.edu.cn)

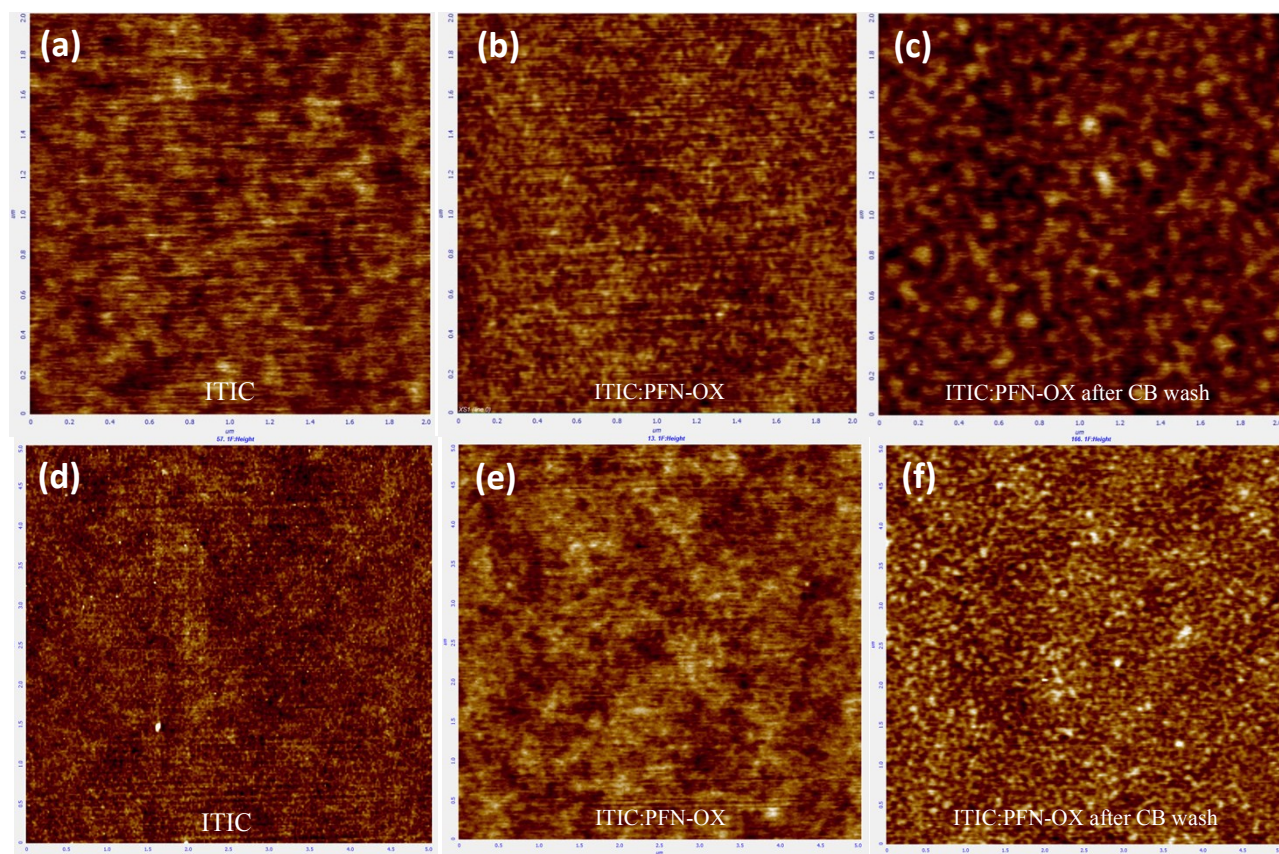

Figure S1. SPM topography images of (a and d) pristine ITIC, and ITIC:PFN-OX (92.5:7.5 wt.%) blend film (b and e) before and (c and f) after CB rinsing. Image size of (a-c) is 2  $\mu\text{m} \times 2 \mu\text{m}$ , and image size of (d-f) 5  $\mu\text{m} \times 5 \mu\text{m}$ .

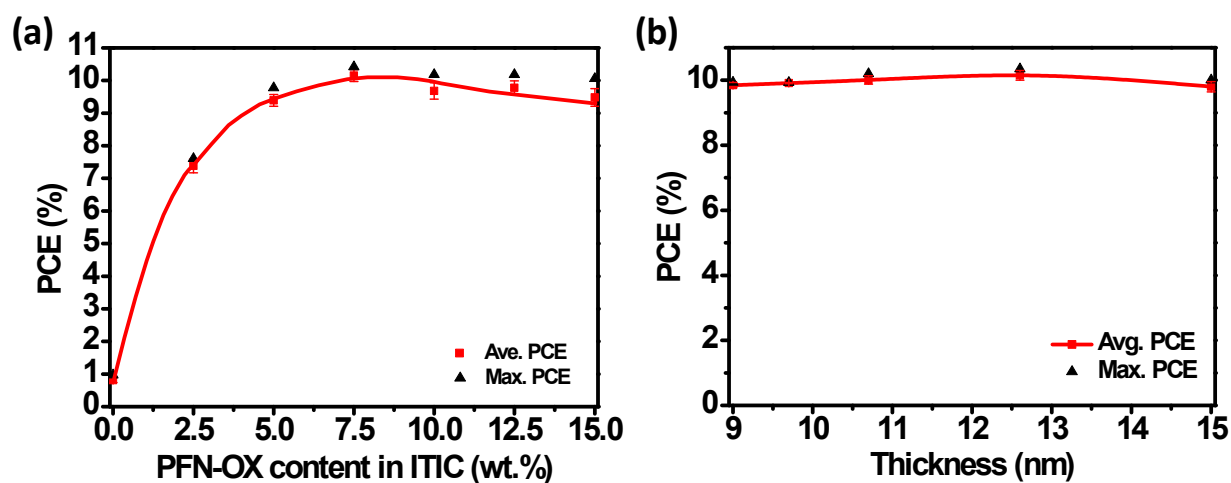

Figure S2. (a) Device PCE as a function of PFN-OX:ITIC ratio in the casting solution. (b) Device PCE as a function of thickness of the ITIC-templated PFN-OX ETL (with a fixed ratio of 7.5:92.5 wt.% in the casting solution).

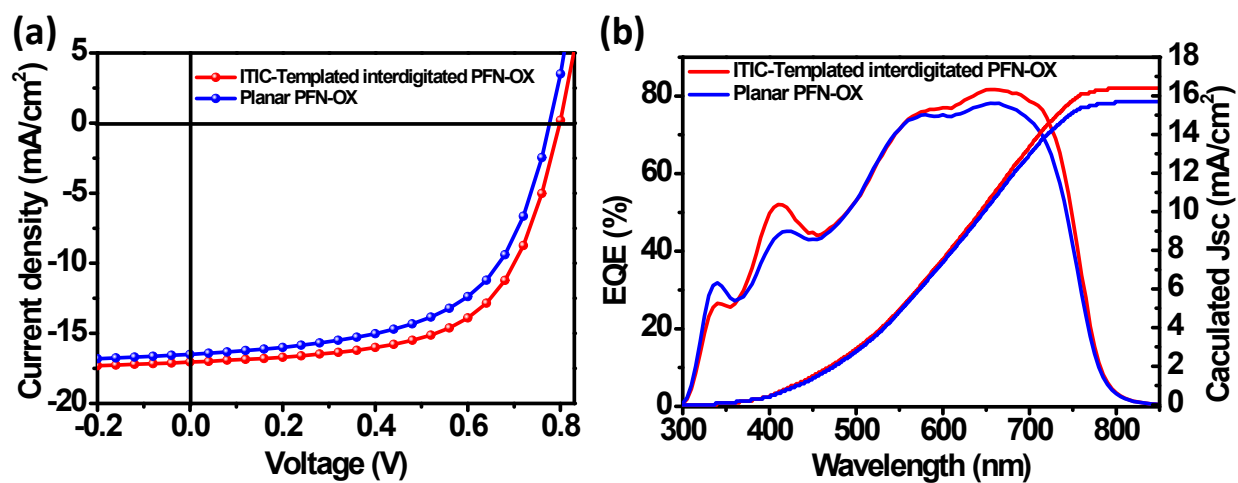

Figure S3. (a) champion J-V curves, (b) corresponding EQE spectra of inverted PTB7-Th:ITIC non-fullerene polymer solar cells employing planar and ITIC-templated interdigitated PFN-OX ETLs.
